# Supplementary material for: The impact of a rapid molecular identification test on positive blood cultures from critically ill with bacteremia: A pre-post intervention study
Source: PubMed Central journal article supplement (PMC6762135; doi:10.1371/journal.pone.0223122), 2019-09-26
Supplement: pone.0223122.s002.pdf [file pone.0223122.s002.pdf]

Investigateur principal Saint-Luc :

Dr. Alexia VERROKEN, PhD  
Microbiologie – Biologie Clinique  
Cliniques universitaires St-Luc  
02.764.67.66  
[alexia.verroken@uclouvain.be](mailto:alexia.verroken@uclouvain.be)

Co-investigateur Saint-Luc :

Pr. Pierre-François LATERRE  
Soins Intensifs  
Cliniques universitaires St-Luc  
02.764.27.35  
[pierre-françois.laterre@uclouvain.be](mailto:pierre-françois.laterre@uclouvain.be)

## PROTOCOLE du projet

### Clinical impact of the FilmArray® blood culture identification panel performed on positive blood cultures from intensive care patients

#### Hypothèse

L'utilisation de l'outil moléculaire FilmArray pour l'identification (et la détection de résistances) des hémocultures positives des patients hospitalisés aux soins intensifs accélère significativement le diagnostic microbiologique de la septicémie et améliore la prise en charge thérapeutique du patient affecté.

#### Protocole

Etude non commerciale prospective non interventionnelle divisée en 2 périodes\*.

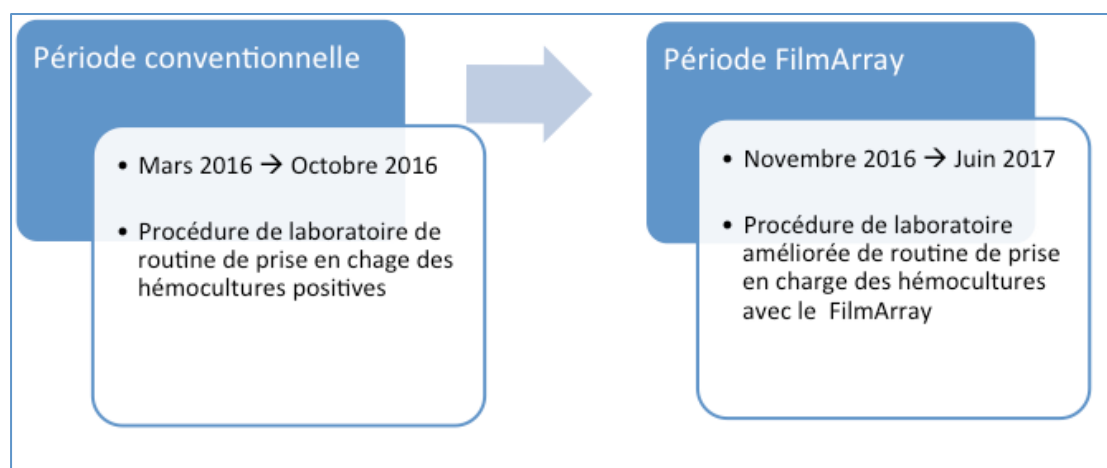

|                |                                                                                                                                                                                                                                                                                                                                                                                                                                                              |
|----------------|--------------------------------------------------------------------------------------------------------------------------------------------------------------------------------------------------------------------------------------------------------------------------------------------------------------------------------------------------------------------------------------------------------------------------------------------------------------|
| <b>Qui ?</b>   | <p>Tout patient adulte (&gt;18 ans) avec une hémoculture positive et hospitalisé aux soins intensifs (SIM, SIT, CVI1, CVI2)</p> <p>Critères d'exclusion<br/> --&gt; Patient qui décède entre le moment où l'hémoculture est prélevée et le moment où l'hémoculture est détectée positive<br/> --&gt; Patient bénéficiant exclusivement de soins de confort</p>                                                                                               |
| <b>Où ?</b>    | Les analyses de laboratoire sont effectuées au laboratoire de routine de microbiologie des Cliniques universitaires Saint-Luc.                                                                                                                                                                                                                                                                                                                               |
| <b>Quand ?</b> | <p>Période conventionnelle: mars 2016 → octobre 2016<br/> Période FilmArray : octobre 2016 → juin 2017</p> <p>La période (en mois) doit correspondre à la récolte de +/- 150 épisodes d'hémocultures positives aux soins intensifs des Cliniques universitaires Saint-Luc.</p>                                                                                                                                                                               |
| <b>Quoi ?</b>  | <p>Selon la période</p> <ul style="list-style-type: none"> <li>- Période conventionnelle : Procédure de laboratoire de routine de prise en charge des hémocultures positives. (Verroken A. et al., PlosOne June 2016)</li> <li>- Période FilmArray : Procédure de laboratoire de routine « améliorée » de prise en charge des hémocultures positives incluant le système moléculaire « FilmArray » et la réalisation des analyses 24h/24 et 7j/7.</li> </ul> |

\*Cette étude est non commerciale et réalisée à l'initiative du Dr. VERROKEN Alexia, chef de laboratoire adjoint au laboratoire de microbiologie des Cliniques universitaires Saint-Luc.

Nous estimons que l'étude est prospective car nous collectons les données de façon longitudinale en temps réel tout au long des 2 périodes de l'étude.

Nous considérons cette étude comme non interventionnelle. En effet nous ne faisons pas l'essai de nouveaux médicaments ou de traitement expérimentaux. La différence entre les 2 périodes siège uniquement dans le temps de rendu des résultats de laboratoire. Dans la période « FilmArray » les résultats d'identification et de détection de résistance sont transmis plus rapidement conduisant à une prescription accélérée de l'antibiotique optimal au patient intensif souffrant d'une septicémie.

| <b>Données patients collectées</b> |                                                    |
|------------------------------------|----------------------------------------------------|
| --> Caractéristiques patients      | Age                                                |
|                                    | Sexe                                               |
|                                    | Score APACHE II                                    |
|                                    | Score SOFA                                         |
|                                    |                                                    |
| --> Comorbidités                   | Diabète                                            |
|                                    | Cancer solide-hématologique                        |
|                                    | Pathologie cardiovasculaire                        |
|                                    | Pathologie respiratoire chronique                  |
|                                    | Pathologie hépatique                               |
|                                    | Greffe d'organe                                    |
|                                    | Hypertension                                       |
|                                    | Neutrophilie < 500/ µl                             |
|                                    | Traitement immunosuppresseur                       |
|                                    |                                                    |
| --> Données microbiologiques       | Type bactériémie (septicémie vs contamination)     |
|                                    | Origine infection                                  |
|                                    | Pathogène(s) identifié(s)                          |
|                                    | Résistances détectées (MRSA, VRE, BLSE, CPE)       |
| --> Temps hémocultures positives   | Temps jusqu'à l'identification bactérienne         |
|                                    | Méthode d'identification                           |
|                                    | Temps jusqu'à la détection partielle de résistance |
|                                    | Méthode de détection partielle de résistance       |
|                                    | Temps jusqu'à l'antibiogramme complet              |
|                                    |                                                    |
| --> Outcomes cliniques             | Temps jusqu'au traitement antibiotique ciblé       |
|                                    | Changement de traitement post résultat FilmArray   |
|                                    | Type de changement                                 |
|                                    | Durée de séjour aux soins intensifs                |
|                                    | Durée de séjour à l'hôpital                        |
|                                    | Mortalité brute à 30 jours                         |
|                                    | Coûts prise en charge septicémie                   |

L'ensemble des temps sont calculés à partir du moment où l'hémoculture est détectée positive.

Les données collectées seront d'emblée anonymisées. Ensuite les données obtenus des patients inclus pendant la période « conventionnelle » et les patients inclus pendant la période « FilmArray » seront comparées entre elles et la plus-value clinique de la technique FilmArray sera calculé par méthodes statistiques.
