# Supplementary material for: The impact of a rapid molecular identification test on positive blood cultures from critically ill with bacteremia: A pre-post intervention study
Source: PubMed Central journal article supplement (PMC6762135; doi:10.1371/journal.pone.0223122), 2019-09-26
Supplement: pone.0223122.s003.pdf [file pone.0223122.s003.pdf]

Principal investigator:

Alexia VERROKEN, MD, PhD  
Department of Microbiology  
Cliniques universitaires Saint-Luc  
02.764.67.66  
[alexia.verroken@uclouvain.be](mailto:alexia.verroken@uclouvain.be)

Co-investigator Saint-Luc :

Pierre-François LATERRE, MD, PhD  
Intensive care Department  
Cliniques universitaires Saint-Luc  
02.764.27.35  
[pierre-françois.laterre@uclouvain.be](mailto:pierre-françois.laterre@uclouvain.be)

## TRIAL STUDY PROTOCOL

### Clinical impact of the FilmArray® blood culture identification panel performed on positive blood cultures from intensive care patients

#### Hypothesis

The integration of the FilmArray® blood culture identification (and resistance detection) panel on positive blood cultures from intensive care patients speeds up the diagnosis of bacteremia and improves antibiotic management.

#### Protocol

Prospective non-commercial non-interventional study divided into 2 study periods.

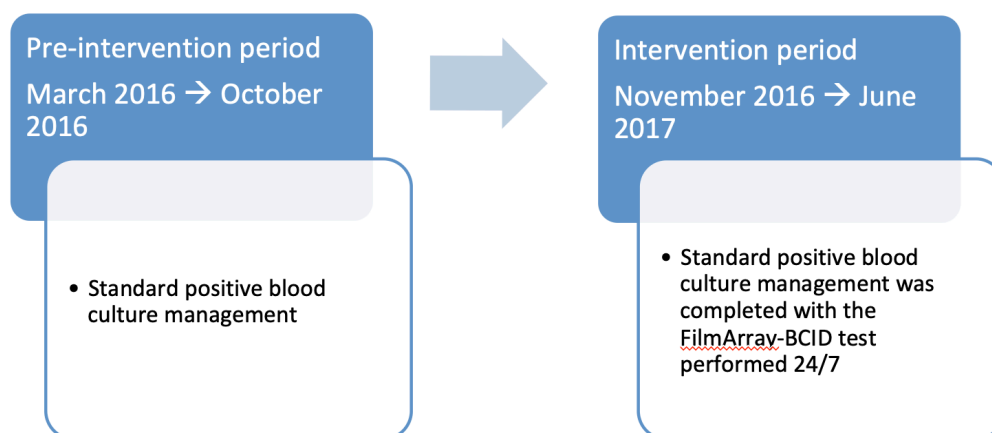

|               |                                                                                                                                                                                                                                                                                                                               |
|---------------|-------------------------------------------------------------------------------------------------------------------------------------------------------------------------------------------------------------------------------------------------------------------------------------------------------------------------------|
| <b>Who?</b>   | All adult patient (>18 years) staying at the intensive care unit at the time of positive blood culture detection.<br><br>Exclusion criteria<br>→ Patients dying between blood culture sampling and positive detection<br>→ Patients receiving palliative care                                                                 |
| <b>Where?</b> | Testing is performed at the routine Microbiology Laboratory of the Cliniques universitaires Saint Luc.                                                                                                                                                                                                                        |
| <b>When?</b>  | Expected pre-intervention period: March 2016 → October 2016<br>Expected intervention period: November 2016 → June 2017<br><br>Each period (in months) has to include approximately 160 positive blood culture episodes at the Intensive care Department of the Cliniques universitaires Saint-Luc.                            |
| <b>What?</b>  | According to the period:<br><br>- Pre-intervention period: Routine laboratory procedure for positive blood cultures. (Verroken A. et al., PlosOne June 2016)<br><br>- Intervention period: Routine laboratory procedure for positive blood cultures “improved” by the addition of the FA-BCID test performed 24h/24 and 7d/7. |

- non-commercial study initiated by VERROKEN Alexia, chief associate of the Microbiology Department of the Cliniques universitaires Saint Luc.

- Prospective study collecting data in real time along the 2 study periods.

- Non-interventional study as no experimental testing is performed. The difference between the 2 observed periods is the routine management of the positive blood cultures as FilmArray® blood culture identification (FA-BCID) testing is added in the intervention period versus the pre-intervention period. Time to identification results is the main difference between the two periods. Subsequently this study will measure the impact on improved antibiotic management due to speeded-up laboratory results in the intervention period.

|                               |                                                                          |
|-------------------------------|--------------------------------------------------------------------------|
| <b>Collected patient data</b> |                                                                          |
| --> Patient characteristics   | Age                                                                      |
|                               | Sex                                                                      |
|                               | APACHE II score                                                          |
|                               | SOFA score                                                               |
|                               |                                                                          |
| --> Comorbidities             | Diabetes                                                                 |
|                               | Active solid/hematological malignancy                                    |
|                               | Cardiovascular disorder                                                  |
|                               | Chronic lung disease                                                     |
|                               | Liver disease                                                            |
|                               | Solid organ transplant                                                   |
|                               | Hypertension                                                             |
|                               | Neutrophil count < 500/ $\mu$ l                                          |
|                               | Immunosuppressive treatment                                              |
|                               |                                                                          |
| --> Microbiological data      | Type of positive blood culture episode (bacteremia versus contamination) |
|                               | Source                                                                   |
|                               | Pathogen                                                                 |
|                               | Detected resistances (MRSA, VRE, ESBL, CPE)                              |
|                               |                                                                          |
| --> Positive blood cultures   | Time to identification                                                   |
|                               | Identification method                                                    |
|                               | Time to result resistance detection test                                 |
|                               | Resistance detection test (beta-lactam test, PLP2a test, FA-BCID test)   |
|                               | Time to complete susceptibility results                                  |
|                               |                                                                          |
| --> Clinical outcomes         | Time to optimal treatment                                                |
|                               | Treatment switch following FA-BCID result                                |
|                               | Type of treatment switch                                                 |
|                               | Length of stay at the ICU                                                |
|                               | Length of stay at the hospital                                           |
|                               | 30-day mortality                                                         |
|                               | Cost linked to the bacteremia                                            |

All time measurements start at the time the blood culture bottle is detected positive by the incubators.

Collected data are immediately anonymized. Subsequently data of the pre-interventional and interventional period will be compared statistically to evaluate the impact of the FA-BCID test.
